# Supplementary material for: Depletion of SNORA33 Abolishes ψ of 28S-U4966 and Affects the Ribosome Translational Apparatus
Source: Int J Mol Sci. 2023 Aug 8;24(16):12578. doi: 10.3390/ijms241612578 (PMC10454564; doi:10.3390/ijms241612578)
Supplement: Supplementary file 1 [file ijms-24-12578-s001.zip › SUP tables proofread.xlsx]

## Sheet: TS1_PsiScore
Table S1: PsiScore values of all rRNA ψ sites in control and OA-SF treated samples (non-OA HACs of 5 individual donors) measured by HydraPsiSeq. Related to Figure 1 and Figure S1.
	PsiScore					PsiScore
Position	Patient #1 Ctrl	Patient #2 Ctrl	Patient #3 Ctrl	Patient #4 Ctrl	Patient #5 Ctrl	Patient #1 OA-SF	Patient #2 OA-SF	Patient #3 OA-SF	Patient #4 OA-SF	Patient #5 OA-SF	snoRNA
hs_rRNA_18S_Psi34	0.949137	0.937939	0.945175	0.935958	0.941772	0.913761	0.919766	0.863773	0.893637	0.941543	ACA50/ACA62
hs_rRNA_18S_Psi36	0.92769	0.907191	0.902785	0.905746	0.925107	0.82196	0.829407	0.785304	0.82212	0.898499	U69
hs_rRNA_18S_Psi93	0.990529	0.990979	0.989785	0.99259	0.994848	0.985722	0.99038	0.98468	0.989893	0.985368	U23
hs_rRNA_18S_Psi105	0.981108	0.984336	0.984657	0.985197	0.984127	0.980346	0.986536	0.982954	0.982844	0.981046	ACA36/ACA36b/ACA50/ACA62
hs_rRNA_18S_Psi109	0.97465	0.976981	0.977902	0.972893	0.969246	0.965931	0.975392	0.972806	0.970846	0.97341	ACA42/ACA67
hs_rRNA_18S_Psi119	0.921061	0.631857	0.897965	0.85576	0.867204	0.875237	0.680403	0.852852	0.873477	0.832372	U66
hs_rRNA_18S_Psi210	0.917122	0.89988	0.930776	0.827903	0.92688	0.888573	0.873556	0.89565	0.705366	0.848227	ACA10
hs_rRNA_18S_Psi218	0.982609	0.977426	0.983975	0.981926	0.974603	0.9826	0.98419	0.977606	0.971251	0.984113	ACA31
hs_rRNA_18S_Psi296	0.598483	0.529925	0.552675	0.458836	0.527549	0.588856	0.557548	0.518918	0.535357	0.541998	unknown
hs_rRNA_18S_Psi406	0.923992	0.926148	0.908243	0.906448	0.921137	0.891716	0.925417	0.92185	0.909905	0.915949	U71a/U71b/U71c/U71d
hs_rRNA_18S_Psi572	0.932041	0.873427	0.924404	0.903817	0.915854	0.898165	0.910253	0.924683	0.894565	0.912767	ACA42/ACA67
hs_rRNA_18S_Psi609	0.957008	0.931845	0.955186	0.904907	0.954876	0.945681	0.958935	0.93989	0.906711	0.947866	ACA24
hs_rRNA_18S_Psi649	0.969222	0.950693	0.961905	0.962673	0.959225	0.954848	0.95105	0.933327	0.951638	0.958097	ACA46
hs_rRNA_18S_Psi651	0.962697	0.946344	0.963367	0.95704	0.95983	0.951752	0.959761	0.957163	0.934246	0.948755	ACA20
hs_rRNA_18S_Psi681	0.907461	0.808325	0.865489	0.862267	0.885148	0.854429	0.811717	0.842387	0.785759	0.849963	unknown
hs_rRNA_18S_Psi686	0.902265	0.906937	0.969777	0.873753	0.942245	0.912788	0.906538	0.930101	0.915671	0.909285	ACA44
hs_rRNA_18S_Psi801	0.967479	0.931763	0.972647	0.969997	0.967295	0.967284	0.977516	0.968142	0.971537	0.967188	ACA25
hs_rRNA_18S_Psi814	0.944574	0.922243	0.950054	0.939205	0.948333	0.934618	0.924284	0.930754	0.898688	0.935358	ACA25/ACA63
hs_rRNA_18S_Psi815	0.945682	0.935312	0.948399	0.942685	0.939132	0.943937	0.946181	0.95212	0.929147	0.940836	ACA28
hs_rRNA_18S_Psi822	0.966725	0.965033	0.972577	0.965624	0.963873	0.966354	0.969407	0.969987	0.953747	0.964998	ACA44
hs_rRNA_18S_Psi863	0.980435	0.980262	0.984362	0.972491	0.979303	0.983273	0.979421	0.982036	0.976066	0.981566	ACA24
hs_rRNA_18S_Psi866	0.993089	0.991881	0.990382	0.98927	0.989789	0.985518	0.989696	0.985051	0.989378	0.989452	ACA28
hs_rRNA_18S_Psi918	0.739483	0.755271	0.65919	0.67976	0.740615	0.671233	0.633453	0.537725	0.618526	0.661695	unknown
hs_rRNA_18S_Psi966	0.978981	0.959287	0.983733	0.970876	0.971097	0.973558	0.97121	0.971769	0.966304	0.978151	ACA14a/ACA14b
hs_rRNA_18S_Psi1004	0.947204	0.90978	0.948095	0.940835	0.945689	0.945973	0.945807	0.942048	0.944538	0.944437	ACA60/U99
hs_rRNA_18S_Psi1045	0.957165	0.927691	0.947939	0.891653	0.913564	0.909687	0.910754	0.914056	0.920461	0.933461	SNORA24/24B
hs_rRNA_18S_Psi1046	0.89761	0.868079	0.899298	0.858396	0.867368	0.887573	0.869279	0.873178	0.834818	0.879727	unknown
hs_rRNA_18S_Psi1056	0.919884	0.912386	0.90019	0.89938	0.91247	0.910507	0.930278	0.925768	0.88639	0.899627	ACA8
hs_rRNA_18S_Psi1081	0.921967	0.922729	0.932137	0.93535	0.966429	0.922168	0.944992	0.926933	0.905031	0.883312	ACA8
hs_rRNA_18S_Psi1136	0.466534	0.662274	0.502703	0.520497	0.480776	0.613791	0.427408	0.559087	0.510498	0.452831	SNORA60
hs_rRNA_18S_Psi1174	0.961803	0.947795	0.964048	0.960716	0.966192	0.960846	0.961787	0.9604	0.965742	0.963626	ACA40
hs_rRNA_18S_Psi1177	0.921075	0.925604	0.884024	0.807557	0.83701	0.898809	0.898864	0.877639	0.773991	0.84203	unknown
hs_rRNA_18S_Psi1232	0.96592	0.955454	0.96385	0.956657	0.974798	0.969384	0.981436	0.980147	0.968881	0.971059	SNORA70
hs_rRNA_18S_Psi1238	0.912726	0.972208	0.937818	0.953166	0.958416	0.956168	0.953873	0.958601	0.944551	0.963068	ACA5/ACA5b/ACA5c
hs_rRNA_18S_Psi1244	0.976792	0.962803	0.980075	0.966557	0.971519	0.975379	0.976774	0.980759	0.968891	0.972394	ACA36/ACA36b
hs_rRNA_18S_Psi1347	0.963897	0.944461	0.966903	0.958149	0.962211	0.966396	0.967296	0.961432	0.956966	0.96198	ACA4
hs_rRNA_18S_Psi1367	0.980824	0.974704	0.982964	0.979301	0.978811	0.97872	0.976162	0.977511	0.976406	0.980274	ACA15
hs_rRNA_18S_Psi1445	0.85531	0.835911	0.871399	0.81238	0.868413	0.842858	0.860996	0.84539	0.797023	0.876	U67
hs_rRNA_18S_Psi1625	0.950119	0.948377	0.958637	0.968162	0.966435	0.945891	0.947638	0.942836	0.943285	0.943328	ACA5/ACA5c
hs_rRNA_18S_Psi1643	0.983941	0.98525	0.985925	0.977594	0.977675	0.986199	0.979924	0.968772	0.978675	0.967564	ACA41
hs_rRNA_18S_Psi1692	0.93937	0.93527	0.958637	0.945938	0.950358	0.944843	0.94058	0.938893	0.934146	0.928333	U70
hs_rRNA_28S_Psi1523	0.86844	0.897034	0.888199	0.849389	0.833552	0.875918	0.869637	0.860394	0.842132	0.869163	unknown
hs_rRNA_28S_Psi1569	0.924594	0.916278	0.915921	0.908819	0.919073	0.874359	0.870155	0.860219	0.850375	0.879929	ACA7/ACA7B
hs_rRNA_28S_Psi1664	0.95152	0.950224	0.949783	0.940505	0.950248	0.942404	0.946528	0.95192	0.936508	0.939351	ACA56
hs_rRNA_28S_Psi1670	0.944916	0.924562	0.949057	0.908454	0.945346	0.941524	0.947513	0.929397	0.945159	0.952689	ACA9
hs_rRNA_28S_Psi1731	0.993443	0.992035	0.99398	0.994015	0.991987	0.992902	0.991235	0.99222	0.995248	0.99062	ACA52
hs_rRNA_28S_Psi1766	0.808561	0.866926	0.691963	0.789175	0.568323	0.705367	0.723599	0.593571	0.547689	0.549452	HBI-115
hs_rRNA_28S_Psi1768	0.978744	0.983683	0.985329	0.974659	0.968015	0.982623	0.981092	0.986753	0.97036	0.97754	SNORA9
hs_rRNA_28S_Psi1769	0.988546	0.979996	0.994129	0.977189	0.975507	0.989265	0.987119	0.989231	0.982554	0.98239	ACA9
hs_rRNA_28S_Psi1779	0.977529	0.961706	0.976977	0.970543	0.975083	0.97759	0.971395	0.970855	0.971305	0.973746	ACA7/ACA7B
hs_rRNA_28S_Psi1847	0.972729	0.956237	0.974733	0.953799	0.959747	0.966799	0.972585	0.96285	0.951245	0.966684	ACA32
hs_rRNA_28S_Psi1849	0.913639	0.843706	0.899123	0.878922	0.908191	0.902174	0.892172	0.916722	0.87152	0.90226	unknown
hs_rRNA_28S_Psi2495	0.79464	0.851542	0.720971	0.773371	0.810981	0.648803	0.563081	0.71918	0.782074	0.811903	ACA61
hs_rRNA_28S_Psi2619	0.916923	0.871878	0.891241	0.872087	0.917494	0.902628	0.864782	0.872816	0.870771	0.892563	SNORA38
hs_rRNA_28S_Psi2826	0.35475	0.328106	0.14854	0.16463	0.23064	0.306339	0.166102	0.183373	-0.0419325	0.0845275	unknown
hs_rRNA_28S_Psi3616	0.996728	0.996251	0.997292	0.996138	0.996173	0.996881	0.996425	0.997099	0.995862	0.996413	ACA6
hs_rRNA_28S_Psi3618	0.982567	0.984373	0.985725	0.9799	0.982658	0.984018	0.985448	0.983189	0.980178	0.980471	ACA19
hs_rRNA_28S_Psi3674	0.937564	0.91149	0.941871	0.925204	0.934345	0.936035	0.934552	0.938191	0.931052	0.934478	unknown
hs_rRNA_28S_Psi3694	0.961553	0.940425	0.970647	0.939498	0.960319	0.954953	0.926873	0.951188	0.924052	0.953558	ACA27
hs_rRNA_28S_Psi3709	0.882606	0.857269	0.843824	0.844342	0.874941	0.830117	0.843924	0.805122	0.781269	0.848238	ACA19
hs_rRNA_28S_Psi3713	0.987113	0.972489	0.981785	0.97359	0.979352	0.980396	0.97018	0.978518	0.963816	0.981783	ACA31
hs_rRNA_28S_Psi3737	0.94923	0.917739	0.955064	0.917408	0.920127	0.935893	0.949569	0.933199	0.910527	0.938436	ACA23
hs_rRNA_28S_Psi3741	0.97538	0.951004	0.97472	0.959022	0.961341	0.961925	0.969057	0.949483	0.9712	0.959094	U19/U19-2
hs_rRNA_28S_Psi3743	0.805884	0.539046	0.727732	0.644277	0.701031	0.566978	0.429612	0.623414	0.684797	0.579238	U19/U19-2
hs_rRNA_28S_Psi3747	0.948726	0.96109	0.963729	0.951341	0.928586	0.955037	0.9648	0.93197	0.960792	0.970057	unknown
hs_rRNA_28S_Psi3749	0.982047	0.967306	0.966057	0.983765	0.961925	0.978592	0.980656	0.979187	0.96903	0.981238	unknown
hs_rRNA_28S_Psi3801	0.953923	0.951662	0.942376	0.930588	0.951023	0.861178	0.881037	0.882725	0.843117	0.897045	ACA54
hs_rRNA_28S_Psi3823	0.98066	0.977692	0.975865	0.963034	0.976417	0.969265	0.975988	0.970843	0.941543	0.976409	ACA58
hs_rRNA_28S_Psi3830	0.952643	0.926037	0.949756	0.936856	0.946124	0.96317	0.963394	0.966099	0.950432	0.954789	E2
hs_rRNA_28S_Psi3832	0.928122	0.906291	0.918824	0.892506	0.922787	0.946857	0.938468	0.954185	0.938894	0.939244	ACA8/E2
hs_rRNA_28S_Psi3863	0.675199	0.581341	0.554479	0.629142	0.594122	0.608901	0.593163	0.552625	0.551656	0.513353	unknown
hs_rRNA_28S_Psi3899	0.975207	0.968259	0.98195	0.966143	0.971738	0.974671	0.976757	0.973871	0.964334	0.973658	ACA3
hs_rRNA_28S_Psi3938	0.939666	0.858252	0.951318	0.933039	0.948267	0.963928	0.928917	0.961136	0.94372	0.966436	ACA3
hs_rRNA_28S_Psi4263	0.974606	0.96014	0.972977	0.967574	0.964333	0.973263	0.973018	0.968405	0.964228	0.971148	ACA2a/ACA2b
hs_rRNA_28S_Psi4266	0.856028	0.762073	0.810338	0.797393	0.82351	0.753089	0.766247	0.751514	0.702753	0.802939	unknown
hs_rRNA_28S_Psi4269	0.986745	0.979685	0.983546	0.98202	0.980612	0.980781	0.983105	0.983932	0.980664	0.983721	ACA34
hs_rRNA_28S_Psi4282	0.976433	0.96813	0.981212	0.966781	0.972198	0.956009	0.958237	0.96861	0.960655	0.965379	ACA2a/ACA2b/ACA34
hs_rRNA_28S_Psi4323	0.959602	0.925263	0.944324	0.959563	0.95872	0.953887	0.958928	0.954824	0.958462	0.95961	unknown
hs_rRNA_28S_Psi4331	0.91832	0.884952	0.930328	0.924541	0.92983	0.91198	0.917041	0.921258	0.90367	0.921553	ACA23/ACA64
hs_rRNA_28S_Psi4373	0.994479	0.995262	0.99411	0.988083	0.989135	0.994683	0.9926	0.993457	0.989272	0.990801	U65
hs_rRNA_28S_Psi4390	0.873137	0.843938	0.87252	0.875654	0.885077	0.866174	0.879524	0.872424	0.85752	0.861329	E3
hs_rRNA_28S_Psi4393	0.981828	0.974789	0.983122	0.964615	0.970059	0.97804	0.98058	0.977029	0.966431	0.978695	U68
hs_rRNA_28S_Psi4401	0.96	0.957398	0.95714	0.938565	0.947519	0.949901	0.95323	0.958954	0.940285	0.967747	ACA21
hs_rRNA_28S_Psi4412	0.990608	0.985097	0.991614	0.989708	0.988641	0.990016	0.989572	0.989757	0.987794	0.990284	ACA16
hs_rRNA_28S_Psi4427	0.975579	0.95872	0.974911	0.965295	0.972283	0.968174	0.971203	0.969355	0.956	0.965823	U65
hs_rRNA_28S_Psi4441	0.976287	0.966559	0.978739	0.968101	0.969873	0.974016	0.975613	0.957517	0.973905	0.972653	ACA1
hs_rRNA_28S_Psi4463	0.778073	0.757936	0.785369	0.722657	0.727881	0.737209	0.753504	0.752596	0.718944	0.733656	SNORA63D
hs_rRNA_28S_Psi4470	0.993464	0.993255	0.995466	0.990615	0.990889	0.993471	0.993243	0.993148	0.991648	0.991577	ACA21
hs_rRNA_28S_Psi4491	0.994122	0.99619	0.993932	0.994611	0.995053	0.995814	0.996016	0.995711	0.992666	0.996316	ACA10
hs_rRNA_28S_Psi4502	0.912029	0.881893	0.928001	0.926247	0.899924	0.941092	0.934777	0.923391	0.931261	0.919209	unknown
hs_rRNA_28S_Psi4522	0.942113	0.943921	0.94385	0.907634	0.925073	0.939143	0.948019	0.924834	0.926859	0.93339	ACA27/HBI-6
hs_rRNA_28S_Psi4546	0.914291	0.843253	0.919948	0.891902	0.900737	0.904192	0.899341	0.918426	0.895005	0.928607	ACA40
hs_rRNA_28S_Psi4549	0.79246	0.790269	0.721332	0.686079	0.766319	0.688498	0.784147	0.69359	0.506746	0.709255	unknown
hs_rRNA_28S_Psi4598	0.787879	0.741168	0.813884	0.79346	0.787077	0.814764	0.765681	0.786699	0.782505	0.842122	ACA17
hs_rRNA_28S_Psi4606	0.479706	0.464095	0.464178	0.43852	0.450031	0.445388	0.37699	0.397724	0.349452	0.412923	HBI-61
hs_rRNA_28S_Psi4643	0.929527	0.935892	0.916493	0.894043	0.940642	0.880002	0.895972	0.870162	0.856305	0.898798	ACA30/ACA37
hs_rRNA_28S_Psi4659	0.979793	0.972915	0.966401	0.978772	0.977191	0.980709	0.983768	0.9762	0.971752	0.980382	ACA17
hs_rRNA_28S_Psi4937	0.882546	0.890927	0.91297	0.879488	0.890895	0.821752	0.825647	0.873358	0.85478	0.875646	ACA17
hs_rRNA_28S_Psi4966	0.828464	0.854324	0.835901	0.807771	0.848504	0.742907	0.79502	0.741469	0.735271	0.811001	ACA22/ACA33
hs_rRNA_28S_Psi4975	0.890179	0.889636	0.841016	0.835812	0.83532	0.82433	0.792811	0.823672	0.783157	0.836099	ACA22/U64
hs_rRNA_5.8S_Psi55	0.995923	0.991969	0.996397	0.99467	0.993991	0.995139	0.99422	0.994433	0.994218	0.994229	U72
hs_rRNA_5.8S_Psi69	0.978452	0.975089	0.980878	0.972074	0.972527	0.977864	0.978094	0.976388	0.970801	0.975627	U69

## Sheet: TS2_PsiScore
Table S2: PsiScore values of all rRNA ψ sites in CRISPR Ctrl and SNORA33-depleted cell pools measured by HydraPsiSeq. Related to Figures 2, 3 and Figure S4.
	PsiScore			PsiScore
	GFP Ctrl 1	GFP Ctrl 2	GFP Ctrl 3	SNORA33 KO 1	SNORA33 KO 2	SNORA33 KO 3
hs_rRNA_18S-Psi34/SNORA50/SNORA76	0.821455	0.797767	0.810163	0.822226	0.80495	0.791466
hs_rRNA_18S-Psi36/SNORA69/SNORA55	0.609142	0.586993	0.58351	0.608222	0.731581	0.616763
hs_rRNA_18S-Psi93/SNORA75	0.980214	0.98909	0.983092	0.98634	0.985858	0.98422
hs_rRNA_18S-Psi105/SNORA36A/B/SNORA50/SNORA75	0.955213	0.969552	0.962312	0.968686	0.970493	0.968222
hs_rRNA_18S-Psi109/SNORA42/SNORA80	0.94305	0.954383	0.952851	0.952897	0.951448	0.962282
hs_rRNA_18S-Psi119/SNORA66	0.676132	0.688475	0.682093	0.683388	0.693776	0.66119
hs_rRNA_18S-Psi210/SNORA10	0.440793	0.424052	0.424622	0.730514	0.635704	0.464622
hs_rRNA_18S-Psi218/SNORA31	0.931524	0.949014	0.946205	0.95029	0.952579	0.956778
hs_rRNA_18S-Psi296/unknown	0.290489	0.26411	0.233451	0.269724	0.401483	0.309627
hs_rRNA_18S-Psi406/SNORA71A/B/C/D	0.82701	0.816614	0.830047	0.80542	0.70636	0.822615
hs_rRNA_18S-Psi572/SNORA42/SNORA80/B	0.765172	0.804409	0.807002	0.792808	0.795658	0.827785
hs_rRNA_18S-Psi609/SNORA24	0.855191	0.870653	0.880192	0.885086	0.892066	0.867446
hs_rRNA_18S-Psi649/SNORA46	0.839672	0.847736	0.835814	0.809148	0.857794	0.840979
hs_rRNA_18S-Psi651/SNORA20	0.870618	0.891341	0.887618	0.871069	0.900594	0.884835
hs_rRNA_18S-Psi681/unknown	0.483391	0.565817	0.609636	0.600535	0.558919	0.57544
hs_rRNA_18S-Psi686/SNORA44	0.783738	0.732519	0.717115	0.657788	0.79965	0.787491
hs_rRNA_18S-Psi801/SNORA25	0.945229	0.957288	0.955922	0.946784	0.94791	0.953456
hs_rRNA_18S-Psi814/SNORA25/SNORA77	0.816468	0.81779	0.835366	0.834824	0.761649	0.818615
hs_rRNA_18S-Psi815/SNORA28	0.906142	0.924046	0.917945	0.914553	0.880039	0.928823
hs_rRNA_18S-Psi822/SNORA44	0.920796	0.935147	0.937019	0.930329	0.938906	0.944774
hs_rRNA_18S-Psi863/SNORA24/SNORA19	0.906242	0.903398	0.90894	0.925786	0.932763	0.934864
hs_rRNA_18S-Psi866/SNORA28	0.95932	0.96444	0.966323	0.963188	0.967318	0.97001
hs_rRNA_18S-Psi918/unknown	0.399424	0.470339	0.44005	0.44906	0.534596	0.532639
hs_rRNA_18S-Psi966/SNORA14A/B	0.84514	0.859648	0.838566	0.851854	0.826183	0.864726
hs_rRNA_18S-Psi1004/SNORA60/SNORA57	0.848861	0.862245	0.858599	0.856349	0.86233	0.868488
hs_rRNA_18S-Psi1045/SNORA24/24B?	0.562714	0.636389	0.61178	0.598975	0.669298	0.630304
hs_rRNA_18S-Psi1046/unknown	0.353626	0.463082	0.480735	0.501078	0.470691	0.431679
hs_rRNA_18S-Psi1056/SNORA8	0.756771	0.753949	0.793423	0.779282	0.812323	0.776042
hs_rRNA_18S-Psi1081/SNORA8	0.497245	0.419215	0.46631	0.484743	0.531658	0.396361
hs_rRNA_18S-Psi1136/SNORA60?	0.419934	0.463002	0.352767	0.321318	0.122616	0.469749
hs_rRNA_18S-Psi1174/SNORA40	0.94175	0.95153	0.948787	0.953126	0.945503	0.957538
hs_rRNA_18S-Psi1177/unknown	0.588403	0.588858	0.614342	0.592815	0.692302	0.577811
hs_rRNA_18S-Psi1232/SNORA70?	0.890459	0.903026	0.891696	0.909275	0.91103	0.911923
hs_rRNA_18S-Psi1238/SNORA5A/B/C	0.881777	0.871065	0.886856	0.87649	0.876568	0.891268
hs_rRNA_18S-Psi1244/SNORA36A/B/C	0.859994	0.856013	0.837977	0.851261	0.865082	0.868423
hs_rRNA_18S-Psi1347/SNORA4	0.907662	0.906304	0.913679	0.909424	0.922009	0.922209
hs_rRNA_18S-Psi1367/SNORA15	0.955681	0.96255	0.961451	0.958856	0.965442	0.971361
hs_rRNA_18S-Psi1445/SNORA67	0.605813	0.600194	0.63454	0.638523	0.604152	0.627899
hs_rRNA_18S-Psi1625/SNORA5A/C	0.920814	0.921068	0.912512	0.920711	0.899444	0.905581
hs_rRNA_18S-Psi1643/SNORA41	0.932168	0.935317	0.928135	0.933179	0.911699	0.876789
hs_rRNA_18S-Psi1692/SNORA70/B/C/D/E/F/G	0.905355	0.923798	0.916341	0.901532	0.91221	0.929069
hs_rRNA_28S-Psi1523/unknown	0.482302	0.509487	0.443039	0.401536	0.255871	0.446235
hs_rRNA_28S-Psi1569/SNORA7A/B	0.27848	0.301178	0.345396	0.283309	0.280398	0.163973
hs_rRNA_28S-Psi1664/SNORA56	0.662687	0.689857	0.670997	0.68175	0.726778	0.718227
hs_rRNA_28S-Psi1670/SNORA9	0.873409	0.885737	0.866987	0.8784	0.867799	0.894617
hs_rRNA_28S-Psi1731/SNORA52	0.982357	0.983477	0.983302	0.985141	0.985592	0.986127
hs_rRNA_28S-Psi1766/SNORA47	-7.8e-05	0.0690315	0.133417	0.0591796	-0.0227784	0.0986044
hs_rRNA_28S-Psi1768/SNORA9?	0.915929	0.916335	0.931956	0.916649	0.93954	0.938023
hs_rRNA_28S-Psi1769/SNORA9	0.926658	0.945933	0.949686	0.948835	0.94965	0.969832
hs_rRNA_28S-Psi1779/SNORA7A/B	0.913666	0.918136	0.923338	0.921107	0.923811	0.926979
hs_rRNA_28S-Psi1847/SNORA32	0.787849	0.787085	0.788774	0.786167	0.789067	0.794683
hs_rRNA_28S-Psi1849/unknown	0.768989	0.771206	0.765686	0.777409	0.758226	0.799253
hs_rRNA_28S-Psi2495/SNORA61	0.139428	0.15608	0.25854	0.209327	-0.0257394	0.0718616
hs_rRNA_28S-Psi2619/SNORA38?	0.689958	0.673997	0.695024	0.694747	0.703356	0.689958
hs_rRNA_28S-Psi2826/unknown	-0.278833	-0.247059	-0.147513	-0.250453	-0.44923	-0.297726
hs_rRNA_28S-Psi3616/SNORA6	0.981769	0.986182	0.986651	0.984466	0.988421	0.988929
hs_rRNA_28S-Psi3618/SNORA19	0.935073	0.946831	0.94752	0.937401	0.954497	0.946303
hs_rRNA_28S-Psi3674/unknown	0.878701	0.894958	0.88507	0.899928	0.894998	0.915413
hs_rRNA_28S-Psi3694/SNORA27	0.782069	0.790395	0.798655	0.793628	0.821807	0.828202
hs_rRNA_28S-Psi3709/SNORA19	0.176403	0.201853	0.234871	0.202804	0.275364	0.117312
hs_rRNA_28S-Psi3713/SNORA31	0.868374	0.873346	0.878263	0.871899	0.875848	0.90136
hs_rRNA_28S-Psi3737/SNORA23	0.398984	0.481375	0.478855	0.475555	0.590004	0.488713
hs_rRNA_28S-Psi3741/SNORA74A/B	0.677506	0.693513	0.706438	0.73281	0.787615	0.739181
hs_rRNA_28S-Psi3743/SNORA74A/B	0.623556	0.447823	0.669454	0.607	0.666186	0.645189
hs_rRNA_28S-Psi3747/unknown	0.80633	0.80379	0.82748	0.824442	0.814185	0.815786
hs_rRNA_28S-Psi3749/unknown	0.899955	0.920931	0.897768	0.901497	0.91596	0.915716
hs_rRNA_28S-Psim3797/SNORA48	0.973533	0.973988	0.973595	0.978963	0.975765	0.976546
hs_rRNA_28S-Psi3801/SNORA54	0.401426	0.361226	0.384611	0.43625	0.463235	0.467069
hs_rRNA_28S-Psi3823/SNORA58	0.594954	0.563657	0.624054	0.590456	0.614927	0.583664
hs_rRNA_28S-Psi3830/SNORA62	0.783738	0.788544	0.801536	0.793435	0.802052	0.826833
hs_rRNA_28S-Psi3832/SNORA8/SNORA62	0.753211	0.775283	0.762556	0.770454	0.776577	0.785312
hs_rRNA_28S-Psi3863/unknown	-0.178613	-0.243091	-0.262417	-0.282842	-0.637533	-0.183827
hs_rRNA_28S-Psi3899/SNORA3	0.860983	0.882358	0.879041	0.89233	0.916264	0.911152
hs_rRNA_28S-Psi3938/SNORA3	0.798746	0.865185	0.884049	0.889555	0.919998	0.851549
hs_rRNA_28S-Psi4263/SNORA2A/B	0.913586	0.921434	0.924915	0.914453	0.933519	0.927635
hs_rRNA_28S-Psi4266/unknown	0.399535	0.412229	0.396047	0.433861	0.316088	0.356711
hs_rRNA_28S-Psi4269/SNORA34	0.913525	0.931437	0.928718	0.918579	0.916485	0.928506
hs_rRNA_28S-Psi4282/SNORA2A/B/SNORA34	0.662847	0.653292	0.637543	0.662302	0.607567	0.624411
hs_rRNA_28S-Psi4323/unknown	0.925894	0.926189	0.928115	0.923271	0.91397	0.935789
hs_rRNA_28S-Psi4331/SNORA23/SNORA78	0.753194	0.773051	0.767295	0.763264	0.738892	0.776527
hs_rRNA_28S-Psi4373/SNORA65	0.957919	0.970534	0.971339	0.9682	0.973061	0.971637
hs_rRNA_28S-Psi4390/SNORA63	0.651025	0.643918	0.659486	0.598868	0.797897	0.608713
hs_rRNA_28S-Psi4393/SNORA68	0.873846	0.891269	0.873236	0.898313	0.844791	0.897488
hs_rRNA_28S-Psi4401/SNORA21	0.91862	0.926882	0.93764	0.943084	0.948789	0.942866
hs_rRNA_28S-Psi4412/SNORA16A	0.964644	0.974703	0.97356	0.972379	0.980572	0.980529
hs_rRNA_28S-Psi4427/SNORA65	0.852434	0.886957	0.880055	0.889703	0.893843	0.889063
hs_rRNA_28S-Psi4441/SNORA1	0.935288	0.946668	0.946693	0.943779	0.950162	0.950972
hs_rRNA_28S-Psi4463/SNORA63D?	0.759	0.775744	0.774438	0.683435	0.812611	0.753947
hs_rRNA_28S-Psi4491/SNORA10	0.98998	0.992029	0.989858	0.991245	0.991925	0.987299
hs_rRNA_28S-Psi4502/unknown	0.913509	0.909641	0.903209	0.912021	0.933272	0.904952
hs_rRNA_28S-Psi4522/SNORA27/SNORA26	0.866089	0.871377	0.883355	0.886196	0.817741	0.841378
hs_rRNA_28S-Psi4546/SNORA40	0.856552	0.801834	0.806971	0.786339	0.815613	0.812658
hs_rRNA_28S-Psi4549/unknown	0.51264	0.494576	0.571888	0.561421	0.562282	0.55061
hs_rRNA_28S-Psi4598/SNORA17	0.537329	0.525501	0.558506	0.564599	0.570242	0.605562
hs_rRNA_28S-Psi4606/SNORA81	0.0866063	0.154095	0.127221	0.0889446	0.133798	0.237109
hs_rRNA_28S-Psi4643/SNORA30/SNORA37	0.568322	0.583737	0.59523	0.613334	0.620914	0.615938
hs_rRNA_28S-Psi4659/SNORA17	0.952495	0.949728	0.95442	0.954654	0.949819	0.95483
hs_rRNA_28S-Psi4937/SNORA17	0.677284	0.649561	0.66985	0.683087	0.69146	0.690342
hs_rRNA_28S-Psi4938/SNORA43	0.139352	0.144703	0.164733	0.144295	0.26863	0.0630113
hs_rRNA_28S-Psi4966/SNORA22/SNORA33	0.625196	0.606525	0.616491	-1.01928	-0.55236	-0.779677
hs_rRNA_28S-Psi4975/SNORA22/SNORA64	0.22502	0.300323	0.30926	0.433813	0.637218	0.529951
hs_rRNA_5.8S-Psi55/SNORA72	0.976518	0.981326	0.979094	0.976972	0.978332	0.984942
hs_rRNA_5.8S-Psi69/SNORA69	0.947154	0.95461	0.953839	0.951423	0.951905	0.959952

## Sheet: TS3_Ribosomal Proteome
Table S3: Seventy-four proteins with differential abundance in ribosomes of SNORA33-depleted cells.
Accession	Description	Anova (p)	Max fold change	Highest mean condition	Average GFP Ctrl	Average SNORA33 KO
Q9Y3I0	RNA-splicing ligase RtcB homolog OS=Homo sapiens OX=9606 GN=RTCB PE=1 SV=1	0.0205983	1.10943	Control	1.50223e+06	1.35405e+06
P35606	Coatomer subunit beta' OS=Homo sapiens OX=9606 GN=COPB2 PE=1 SV=2	0.0444068	1.14402	RA33 KO	838818	959627
Q92896	Golgi apparatus protein 1 OS=Homo sapiens OX=9606 GN=GLG1 PE=1 SV=2	0.023626	1.14969	RA33 KO	1.51274e+06	1.73918e+06
Q96PV4	Paraneoplastic antigen-like protein 5 OS=Homo sapiens OX=9606 GN=PNMA5 PE=1 SV=2	0.0389798	1.15803	Control	1.97699e+07	1.70719e+07
P62857	40S ribosomal protein S28 OS=Homo sapiens OX=9606 GN=RPS28 PE=1 SV=1	0.00796095	1.16154	RA33 KO	1.63206e+07	1.89569e+07
P61221	ATP-binding cassette sub-family E member 1 OS=Homo sapiens OX=9606 GN=ABCE1 PE=1 SV=1	0.0371262	1.18342	RA33 KO	1.0366e+06	1.22673e+06
P39656	Dolichyl-diphosphooligosaccharide--protein glycosyltransferase 48 kDa subunit OS=Homo sapiens OX=9606 GN=DDOST PE=1 SV=4	0.0228108	1.18771	Control	1.90629e+06	1.60501e+06
P51610	Host cell factor 1 OS=Homo sapiens OX=9606 GN=HCFC1 PE=1 SV=2	0.00210671	1.1963	Control	131434	109867
Q6UVK1	Chondroitin sulfate proteoglycan 4 OS=Homo sapiens OX=9606 GN=CSPG4 PE=1 SV=2	0.0441627	1.20128	RA33 KO	2.05221e+06	2.46527e+06
Q14004;P50750;O94921	Cyclin-dependent kinase 13 OS=Homo sapiens OX=9606 GN=CDK13 PE=1 SV=2	0.0174378	1.20205	Control	276339	229891
Q16576;Q09028	Histone-binding protein RBBP7 OS=Homo sapiens OX=9606 GN=RBBP7 PE=1 SV=1	0.0405506	1.20996	RA33 KO	325059	393308
O75821	Eukaryotic translation initiation factor 3 subunit G OS=Homo sapiens OX=9606 GN=EIF3G PE=1 SV=2	0.0189825	1.21974	RA33 KO	5.36467e+06	6.54349e+06
O00303	Eukaryotic translation initiation factor 3 subunit F OS=Homo sapiens OX=9606 GN=EIF3F PE=1 SV=1	0.0223632	1.22547	RA33 KO	2.56468e+06	3.14295e+06
Q9ULX3	RNA-binding protein NOB1 OS=Homo sapiens OX=9606 GN=NOB1 PE=1 SV=1	0.0305501	1.22803	RA33 KO	53436.1	65621.1
Q9BPW8	Protein NipSnap homolog 1 OS=Homo sapiens OX=9606 GN=NIPSNAP1 PE=1 SV=1	0.0143455	1.22822	Control	82139.1	66876.7
Q969S3	Zinc finger protein 622 OS=Homo sapiens OX=9606 GN=ZNF622 PE=1 SV=1	0.0212432	1.25238	RA33 KO	957104	1.19866e+06
P47897	Glutamine--tRNA ligase OS=Homo sapiens OX=9606 GN=QARS1 PE=1 SV=1	0.0156859	1.25507	Control	5.39602e+06	4.29937e+06
Q9Y3C1	Nucleolar protein 16 OS=Homo sapiens OX=9606 GN=NOP16 PE=1 SV=2	0.0214338	1.25642	Control	267221	212685
P29692	Elongation factor 1-delta OS=Homo sapiens OX=9606 GN=EEF1D PE=1 SV=5	0.0201954	1.26057	Control	2.49889e+06	1.98235e+06
P31689	DnaJ homolog subfamily A member 1 OS=Homo sapiens OX=9606 GN=DNAJA1 PE=1 SV=2	0.00964261	1.26638	Control	552981	436662
Q5SW79	Centrosomal protein of 170 kDa OS=Homo sapiens OX=9606 GN=CEP170 PE=1 SV=1	0.00573433	1.27129	Control	97786.1	76918.7
O75382	Tripartite motif-containing protein 3 OS=Homo sapiens OX=9606 GN=TRIM3 PE=1 SV=2	0.0047801	1.29059	RA33 KO	109745	141636
P35250	Replication factor C subunit 2 OS=Homo sapiens OX=9606 GN=RFC2 PE=1 SV=3	0.0285605	1.29081	Control	936520	725531
Q15046	Lysine--tRNA ligase OS=Homo sapiens OX=9606 GN=KARS1 PE=1 SV=3	0.02789	1.29398	Control	8.57385e+06	6.62596e+06
Q12797	Aspartyl/asparaginyl beta-hydroxylase OS=Homo sapiens OX=9606 GN=ASPH PE=1 SV=3	0.0283066	1.29531	Control	1.43515e+07	1.10796e+07
Q29RF7	Sister chromatid cohesion protein PDS5 homolog A OS=Homo sapiens OX=9606 GN=PDS5A PE=1 SV=1	0.0099136	1.30111	Control	103244	79350.5
P02452	Collagen alpha-1(I) chain OS=Homo sapiens OX=9606 GN=COL1A1 PE=1 SV=5	0.00944351	1.32445	RA33 KO	39514.7	52335.4
Q9Y295	Developmentally-regulated GTP-binding protein 1 OS=Homo sapiens OX=9606 GN=DRG1 PE=1 SV=1	0.0254124	1.33586	RA33 KO	1.19518e+06	1.59659e+06
O43237	Cytoplasmic dynein 1 light intermediate chain 2 OS=Homo sapiens OX=9606 GN=DYNC1LI2 PE=1 SV=1	0.0112458	1.33629	RA33 KO	65869.4	88020.6
P14868	Aspartate--tRNA ligase, cytoplasmic OS=Homo sapiens OX=9606 GN=DARS1 PE=1 SV=2	0.0256927	1.3388	Control	7.66308e+06	5.72385e+06
P60660;P05976	Myosin light polypeptide 6 OS=Homo sapiens OX=9606 GN=MYL6 PE=1 SV=2	0.0381482	1.34183	Control	2.76154e+06	2.05803e+06
Q8NBJ5;Q8IYK4	Procollagen galactosyltransferase 1 OS=Homo sapiens OX=9606 GN=COLGALT1 PE=1 SV=1	0.00351726	1.34306	Control	462338	344243
O94874	E3 UFM1-protein ligase 1 OS=Homo sapiens OX=9606 GN=UFL1 PE=1 SV=2	0.0444359	1.34437	RA33 KO	649972	873801
Q9UNQ2	Probable dimethyladenosine transferase OS=Homo sapiens OX=9606 GN=DIMT1 PE=1 SV=1	0.0123822	1.35774	Control	318099	234286
Q3MHD2	Protein LSM12 homolog OS=Homo sapiens OX=9606 GN=LSM12 PE=1 SV=2	0.0196235	1.36883	Control	283239	206921
Q9BQ04	RNA-binding protein 4B OS=Homo sapiens OX=9606 GN=RBM4B PE=1 SV=1	0.0244939	1.36885	RA33 KO	312975	428416
Q12904	Aminoacyl tRNA synthase complex-interacting multifunctional protein 1 OS=Homo sapiens OX=9606 GN=AIMP1 PE=1 SV=2	0.0404638	1.36898	Control	5.01117e+06	3.66051e+06
O15258	Protein RER1 OS=Homo sapiens OX=9606 GN=RER1 PE=1 SV=1	0.034179	1.37797	Control	633080	459429
P40937	Replication factor C subunit 5 OS=Homo sapiens OX=9606 GN=RFC5 PE=1 SV=1	0.0157579	1.40374	Control	46472.7	33106.3
O00458	Interferon-related developmental regulator 1 OS=Homo sapiens OX=9606 GN=IFRD1 PE=1 SV=4	0.0180624	1.41539	RA33 KO	102215	144674
Q5J8M3	ER membrane protein complex subunit 4 OS=Homo sapiens OX=9606 GN=EMC4 PE=1 SV=2	0.0273187	1.42033	Control	266588	187694
Q9H269	Vacuolar protein sorting-associated protein 16 homolog OS=Homo sapiens OX=9606 GN=VPS16 PE=1 SV=2	0.0326191	1.42207	Control	139745	98269
Q8TB61	Adenosine 3'-phospho 5'-phosphosulfate transporter 1 OS=Homo sapiens OX=9606 GN=SLC35B2 PE=1 SV=1	0.0218728	1.4238	Control	58964.7	41413.6
Q92504	Zinc transporter SLC39A7 OS=Homo sapiens OX=9606 GN=SLC39A7 PE=1 SV=2	0.0484638	1.42761	Control	78683.3	55115.3
P07814	Bifunctional glutamate/proline--tRNA ligase OS=Homo sapiens OX=9606 GN=EPRS1 PE=1 SV=5	0.0127719	1.42971	Control	2.14968e+07	1.50358e+07
O60568	Multifunctional procollagen lysine hydroxylase and glycosyltransferase LH3 OS=Homo sapiens OX=9606 GN=PLOD3 PE=1 SV=1	0.0117337	1.43325	Control	1.19216e+06	831787
P62495	Eukaryotic peptide chain release factor subunit 1 OS=Homo sapiens OX=9606 GN=ETF1 PE=1 SV=3	0.0469566	1.44528	RA33 KO	332305	480273
Q9P0V3	SH3 domain-binding protein 4 OS=Homo sapiens OX=9606 GN=SH3BP4 PE=1 SV=1	0.0314564	1.44566	Control	401965	278049
P85037	Forkhead box protein K1 OS=Homo sapiens OX=9606 GN=FOXK1 PE=1 SV=1	0.0351804	1.46695	Control	132849	90561.8
O75323	Protein NipSnap homolog 2 OS=Homo sapiens OX=9606 GN=NIPSNAP2 PE=1 SV=1	0.0339531	1.48596	Control	119320	80298.1
Q5VTE0;Q05639	Putative elongation factor 1-alpha-like 3 OS=Homo sapiens OX=9606 GN=EEF1A1P5 PE=5 SV=1	0.0391165	1.48783	Control	1.80536e+07	1.21342e+07
O00622	CCN family member 1 OS=Homo sapiens OX=9606 GN=CCN1 PE=1 SV=1	0.000962441	1.49399	Control	233410	156233
O94851;Q7RTP6	[F-actin]-monooxygenase MICAL2 OS=Homo sapiens OX=9606 GN=MICAL2 PE=1 SV=1	0.0324129	1.50607	Control	1.36374e+06	905494
Q9P1Z9	Coiled-coil domain-containing protein 180 OS=Homo sapiens OX=9606 GN=CCDC180 PE=2 SV=3	0.0204469	1.51869	Control	150451	99066.1
Q96JB5	CDK5 regulatory subunit-associated protein 3 OS=Homo sapiens OX=9606 GN=CDK5RAP3 PE=1 SV=2	0.0336841	1.52303	RA33 KO	657637	1.0016e+06
Q9Y3E5	Peptidyl-tRNA hydrolase 2, mitochondrial OS=Homo sapiens OX=9606 GN=PTRH2 PE=1 SV=1	0.0291949	1.52905	Control	166019	108577
O60524	Nuclear export mediator factor NEMF OS=Homo sapiens OX=9606 GN=NEMF PE=1 SV=4	0.00887836	1.53222	RA33 KO	737653	1.13025e+06
Q14103	Heterogeneous nuclear ribonucleoprotein D0 OS=Homo sapiens OX=9606 GN=HNRNPD PE=1 SV=1	0.0195009	1.54483	RA33 KO	547380	845608
Q8WUY1	Protein THEM6 OS=Homo sapiens OX=9606 GN=THEM6 PE=1 SV=2	0.0241935	1.55405	Control	80858.2	52030.8
Q9Y4P3	Transducin beta-like protein 2 OS=Homo sapiens OX=9606 GN=TBL2 PE=1 SV=1	0.00794451	1.56928	Control	1.74447e+06	1.11164e+06
O14578	Citron Rho-interacting kinase OS=Homo sapiens OX=9606 GN=CIT PE=1 SV=2	0.00445663	1.57432	Control	87344.3	55480.6
Q9NZ01	Very-long-chain enoyl-CoA reductase OS=Homo sapiens OX=9606 GN=TECR PE=1 SV=1	0.0189993	1.57811	Control	1.52236e+06	964670
Q13724	Mannosyl-oligosaccharide glucosidase OS=Homo sapiens OX=9606 GN=MOGS PE=1 SV=5	0.0478038	1.61861	Control	475493	293766
P17858	ATP-dependent 6-phosphofructokinase, liver type OS=Homo sapiens OX=9606 GN=PFKL PE=1 SV=6	0.0347452	1.67965	Control	60697.3	36136.9
Q02241	Kinesin-like protein KIF23 OS=Homo sapiens OX=9606 GN=KIF23 PE=1 SV=3	0.00436054	1.71576	Control	276569	161193
Q96CT7	Coiled-coil domain-containing protein 124 OS=Homo sapiens OX=9606 GN=CCDC124 PE=1 SV=1	0.0260175	1.76707	RA33 KO	2.97811e+06	5.26252e+06
Q8NB16	Mixed lineage kinase domain-like protein OS=Homo sapiens OX=9606 GN=MLKL PE=1 SV=1	0.0297887	1.79254	Control	156571	87346.2
P11586	C-1-tetrahydrofolate synthase, cytoplasmic OS=Homo sapiens OX=9606 GN=MTHFD1 PE=1 SV=3	0.00238454	1.90409	RA33 KO	120981	230358
Q99729	Heterogeneous nuclear ribonucleoprotein A/B OS=Homo sapiens OX=9606 GN=HNRNPAB PE=1 SV=2	0.00493225	1.93526	RA33 KO	108736	210433
Q5F1R6	DnaJ homolog subfamily C member 21 OS=Homo sapiens OX=9606 GN=DNAJC21 PE=1 SV=2	0.0119625	2.01919	RA33 KO	47815	96547.7
O94822	E3 ubiquitin-protein ligase listerin OS=Homo sapiens OX=9606 GN=LTN1 PE=1 SV=6	0.0086866	2.25137	RA33 KO	116414	262091
Q7L0Y3	tRNA methyltransferase 10 homolog C OS=Homo sapiens OX=9606 GN=TRMT10C PE=1 SV=2	0.00418087	2.33238	Control	34170.5	14650.5
P53396	ATP-citrate synthase OS=Homo sapiens OX=9606 GN=ACLY PE=1 SV=3	0.00728601	5.24561	RA33 KO	12238.5	64198.4
Q13454	Tumor suppressor candidate 3 OS=Homo sapiens OX=9606 GN=TUSC3 PE=1 SV=1	0.00607801	Infinity	Control	11694.7	0

## Sheet: TS4_Ribosomal Proteome
Table S4: Functional categorization of the seventy-four proteins with differential abundance in ribosomes of SNORA33-depleted cells.
Accession	Gene	Function
O00303	EIF3F	Translation initiation factor
O60524	NEMF	Translation
O75821	EIF3G	Translation initiation factor
O94822	LTN1	Translation
P07814	EPRS1	Translation
P14868	DARS1	Translation
P29692	EEF1D	Translation elongation factor
P31689	DNAJA1	Ribosome biogenesis
P35250	RFC2	Ribosome biogenesis
P39656	DDOST	Translation
P40937	RFC5	Ribosome biogenesis
P47897	QARS1	Translation
P61221	ABCE1	Ribosome biogenesis, translation
P62495	ETF1	Ribosome biogenesis, translation
P62857	RPS28	Core ribosomal protein
Q12904	AIMP1	Translation
Q14103	HNRNPD	ITAF
Q15046	KARS1	Translation
Q16576;Q09028	RBBP7	Ribosome biogenesis
Q29RF7	PDS5A	Ribosome biogenesis
Q5F1R6	DNAJC21	Ribosome biogenesis
Q8NB16	MLKL	Ribosome biogenesis
Q969S3	ZNF622	Ribosome biogenesis
Q99729	HNRNPAB	Ribosome biogenesis
Q9BQ04	RBM4B	Ribosome biogenesis
Q9ULX3	NOB1	Ribosome biogenesis
Q9Y3C1	NOP16	Ribosome biogenesis
Q5VTE0;Q05639	A1P5
P53396	ACLY
Q12797	ASPH
Q96CT7	CCDC124
Q9P1Z9	CCDC180
O00622	CCN1
Q14004;P50750;O94921	CDK13
Q96JB5	CDK5RAP3
Q5SW79	CEP170
O14578	CIT
P02452	COL1A1
Q8NBJ5;Q8IYK4	COLGALT1
P35606	COPB2
Q6UVK1	CSPG4
Q9UNQ2	DIMT1
Q9Y295	DRG1
O43237	DYNC1LI2
Q5J8M3	EMC4
P85037	FOXK1
Q92896	GLG1
P51610	HCFC1
O00458	IFRD1
Q02241	KIF23
Q3MHD2	LSM12
O94851;Q7RTP6	MICAL2
Q13724	MOGS
P11586	MTHFD1
P60660;P05976	MYL6
Q9BPW8	NIPSNAP1
O75323	NIPSNAP2
P17858	PFKL
O60568	PLOD3
Q96PV4	PNMA5
Q9Y3E5	PTRH2
O15258	RER1
Q9Y3I0	RTCB
Q9P0V3	SH3BP4
Q8TB61	SLC35B2
Q92504	SLC39A7
Q9Y4P3	TBL2
Q9NZ01	TECR
Q8WUY1	THEM6
O75382	TRIM3
Q7L0Y3	TRMT10C
Q13454	TUSC3
O94874	UFL1
Q9H269	VPS16

## Sheet: TS5_Cellular proteome
Table S5: Twenty-eight differentially expressed (DE) cellular proteins in SNORA33-depleted cells compared to CRISPR controls.
Accession	Description	Anova (p)	Max fold change	Highest mean condition	Average CRISPR Ctrl	Average SNORA33 KO
O95602	DNA-directed RNA polymerase I subunit RPA1 OS=Homo sapiens OX=9606 GN=POLR1A PE=1 SV=2	0.00676388	12.0684	RA33 KO	12648.6	152649
Q9NWV8	BRISC and BRCA1-A complex member 1 OS=Homo sapiens OX=9606 GN=BABAM1 PE=1 SV=1	0.00484656	8.34497	control	169972	20368.2
O43731	ER lumen protein-retaining receptor 3 OS=Homo sapiens OX=9606 GN=KDELR3 PE=1 SV=1	0.000567102	7.43023	control	64323.9	8657.05
Q9NSB4	Keratin, type II cuticular Hb2 OS=Homo sapiens OX=9606 GN=KRT82 PE=1 SV=3	0.0323629	5.81663	RA33 KO	104814	609666
Q16204	Coiled-coil domain-containing protein 6 OS=Homo sapiens OX=9606 GN=CCDC6 PE=1 SV=2	0.0445415	4.08495	RA33 KO	9972.86	40738.7
Q9H2U2	Inorganic pyrophosphatase 2, mitochondrial OS=Homo sapiens OX=9606 GN=PPA2 PE=1 SV=2	0.0407646	2.67484	control	263554	98530.7
Q9UHB4	NADPH-dependent diflavin oxidoreductase 1 OS=Homo sapiens OX=9606 GN=NDOR1 PE=1 SV=1	0.0492165	2.30082	control	118935	51692.1
P49792;A6NKT7;P0DJD0	E3 SUMO-protein ligase RanBP2 OS=Homo sapiens OX=9606 GN=RANBP2 PE=1 SV=2	0.00447583	2.18407	control	1.89219e+06	866360
Q13268	Dehydrogenase/reductase SDR family member 2, mitochondrial OS=Homo sapiens OX=9606 GN=DHRS2 PE=1 SV=4	9.24e-05	1.99587	control	149078	74693.5
Q5I0G3	Putative malate dehydrogenase 1B OS=Homo sapiens OX=9606 GN=MDH1B PE=2 SV=1	0.0180096	1.94301	control	2.23606e+06	1.15082e+06
Q68E01	Integrator complex subunit 3 OS=Homo sapiens OX=9606 GN=INTS3 PE=1 SV=1	0.0128022	1.86843	control	109892	58815.3
P01023	Alpha-2-macroglobulin OS=Homo sapiens OX=9606 GN=A2M PE=1 SV=3	0.000496384	1.8421	control	851179	462069
P02765	Alpha-2-HS-glycoprotein OS=Homo sapiens OX=9606 GN=AHSG PE=1 SV=2	0.00656748	1.826	control	2.56678e+06	1.40568e+06
P02768	Albumin OS=Homo sapiens OX=9606 GN=ALB PE=1 SV=2	0.044749	1.8233	control	3.15208e+07	1.72878e+07
Q8TCG1	Protein CIP2A OS=Homo sapiens OX=9606 GN=CIP2A PE=1 SV=2	0.0187771	1.74041	control	272154	156373
Q15291	Retinoblastoma-binding protein 5 OS=Homo sapiens OX=9606 GN=RBBP5 PE=1 SV=2	0.034716	1.73823	control	70593.3	40612.3
P24539	ATP synthase F(0) complex subunit B1, mitochondrial OS=Homo sapiens OX=9606 GN=ATP5PB PE=1 SV=2	0.0435435	1.73747	control	484716	278978
Q9Y5V0	Zinc finger protein 706 OS=Homo sapiens OX=9606 GN=ZNF706 PE=1 SV=1	0.0310066	1.68154	RA33 KO	543981	914726
Q2M2I8	AP2-associated protein kinase 1 OS=Homo sapiens OX=9606 GN=AAK1 PE=1 SV=3	0.0316607	1.6663	control	523994	314465
Q92556	Engulfment and cell motility protein 1 OS=Homo sapiens OX=9606 GN=ELMO1 PE=1 SV=2	0.0236932	1.65672	control	156345	94370.2
P11766	Alcohol dehydrogenase class-3 OS=Homo sapiens OX=9606 GN=ADH5 PE=1 SV=4	0.00925332	1.65545	RA33 KO	3.7567e+06	6.21904e+06
Q14690	Protein RRP5 homolog OS=Homo sapiens OX=9606 GN=PDCD11 PE=1 SV=3	0.00281648	1.63265	control	237777	145639
Q9NR56	Muscleblind-like protein 1 OS=Homo sapiens OX=9606 GN=MBNL1 PE=1 SV=2	0.0426279	1.6232	control	511661	315218
P22059	Oxysterol-binding protein 1 OS=Homo sapiens OX=9606 GN=OSBP PE=1 SV=1	0.0451479	1.59398	control	372354	233600
Q86UE4	Protein LYRIC OS=Homo sapiens OX=9606 GN=MTDH PE=1 SV=2	0.00369245	1.57991	control	724277	458429
P69905	Hemoglobin subunit alpha OS=Homo sapiens OX=9606 GN=HBA1 PE=1 SV=2	0.0370315	1.57614	control	588792	373565
Q9NR50	Translation initiation factor eIF-2B subunit gamma OS=Homo sapiens OX=9606 GN=EIF2B3 PE=1 SV=1	0.00725594	1.54129	RA33 KO	223418	344351
P04004	Vitronectin OS=Homo sapiens OX=9606 GN=VTN PE=1 SV=1	0.000628607	1.5098	control	5.3409e+06	3.53749e+06

## Sheet: TS6_Sequences
Table S6: CRISPR-Cas9 single guide RNA sequences, genomic and qPCR primers, and dual-luciferase IRES and translation fidelity inserts used in this study.
Guide sequence	5' - 3'
SNORA22 sgRNA1	AGCAGGCAATGCTCTAGCAC
SNORA22 sgRNA2	CTCTTCTCCTCTGCATTAAA
SNORA33 sgRNA1	GTCGTTAAGGTCCCTGAGAA
SNORA33 sgRNA2	AATCAGGTAAGCAGATTCAT
GFP1	GGGCGAGGAGCTGTTCACCG
GFP2	GGCCACAAGTTCAGCGTGTC
Genomic primers	Forward (5'- 3')	Reverse (5'- 3')
hSNORA22	ACTAGCGGAGGCCATACAGT	ATGCCCTGGCCACATCTTTA
hSNORA33	ACTGCCATGTCACCCTTCTG	AACCTGCCCAGCAAGTCTAC
RT-qPCR primers	Forward (5'- 3')	Reverse (5'- 3')
hSNORA22	CAGTGAACACCCAAGTGTGCTT	GGAGAAGAGCAGGCAATGCT
hSNORq33	GCCAGCCAATGAATCTGCTT	GCTCGTAACATGGCTTTACTATTGC
hCCT6P1 splicing	AGCTGCTGAAACAGGCAGATC	CAGCTTCAAATCCTTCAGTGATTATT
hCCT6P1 CDS	GGAAGTGGCAATGGCAGAA	GCTGTGCCTTGCCCTTTACA
hRPS12 splicing	CCGTAAAGTGGTTGGTTGCA	TGACATCCTTGGCCTGAGACT
hRPS12 CDS	GATGGCCTAGCACGTGGAA	GGGCTTGGCGCTTGTCTAA
hPPIA	TTCCTCCTTTCACAGAATTATTCCA	CCGCCAGTGCCATTATGG
CrPV IGR IRES sequence:
5’- GCAAAAATGTGATCTTGCTTGTAAATACAATTTTGAGAGGTTAATAAATTACAAGTAGTGCTATTTTTGTATTTAGGTTAGCTATTTAGCTTTACGTTCCAGGATGCCTAGTGGCAGCCCCACAATATCCAGGAAGCCCTCTCTGCGGTTTTTCAGATTAGGTAGTCGAAAAACCTAAGAAATTTACCTGCTACATTTCAAGAT-3’
P53 IRES sequence:
5’-TCTAGAGCCACCGTCCAGGGAGCAGGTAGCTGCTGGGCTCCGGGGACACTTTGCGTTCGGGCTGGGAGCGTGCTTTCCACGACGGTGACACGCTTCCCTGGATTGGCAGCCAGACTGCCTTCCGGGTCACTGCC-3’
HCV IRES sequence:
5’-GGCGACACTCCACCATAGATCACTCCCCTGTGAGGAACTACTGTCTTCACGCAGAAAGCGTCTAGCCATGGCGTTAGTATGAGTGTCGTGCAGCCTCCAGGACCCCCCCTCCCGGGAGAGCCATAGTGGTCTGCGGAACCGGTGAGTACACCGGAATTGCCAGGACGACCGGGTCCTTTCTTGGATTAACCCGCTCAATGCCTGGAGATTTGGGCGTGCCCCCGCGAGACTGCTAGCCGAGTAGTGTTGGGTCGCGAAAGGCCTTGTGGTACTGCCTGATAGGGTGCTTGCGAGTGCCCCGGGAGGTCTCGTAGACCGTGCATCATGAGCACGAATCCTAAACCTCAAAGAAAAA-3’
Readthrough sequence
5’- ATGTCGACGGGGGCCCCTAGGAGATCTAGCGCTGGATCCCCCGGGGAGCTC- 3’
UAA in 0 frame
5’ – ATGTCGACGGGGGCCCCTAGGAGATCTAGCGCTTAATCCCCCGGGGAGCTC – 3’
HIV-1 PRF
5’ - ATGTCGACGGATCCTTTTTTAGGGAAGATCTGGCCTTCCCACAAGGGGAGGCCAGGGAATTTTCTTCCGAGCTC – 3’

## Sheet: TS7_RLUC, FLUC
Table S7: Raw RLU (raw light units) of the translational modus and fidelity Dual-Luciferase® Reporter (DLR™) Assay. (Rluc - Renilla luciferase, Fluc - Firefly luciferase)
RLU (Raw light units)
	CrPV IRES		HCV IRES		P35 IRES		Readthrough		UAA		PRF
	CRISPR Ctrl	SNORA33 KO	CRISPR Ctrl	SNORA33 KO	CRISPR Ctrl	SNORA33 KO	CRISPR Ctrl	SNORA33 KO	CRISPR Ctrl	SNORA33 KO	CRISPR Ctrl	SNORA33 KO
Fluc	22977	15621	1003185	545340	251589	156166	1233445	1124066	19516	11670	246541	140987
	21187	18717	911954	616784	203790	149709	1373121	1072560	19492	14005	193211	122586
	21852	17260	848241	590348	226214	194360	1332173	1308988	20720	16231	182547	174307
	95149	89748	1065611	860460	205928	166321	7017400	4750810	40856	33119	691505	534675
	90247	101382	912931	950266	197435	183164	6134564	4576692	39224	33340	551139	499578
	78091	93304	930891	1020436	202759	171819	6273792	5075248	36230	36999	605562	445139
	33530	32414	916619	893226	208330	215595	3881819	3349141	39707	31250	708440	462905
	33286	42494	817261	704453	202054	193862	3534602	3275278	29335	26563	607355	329163
	25098	33934	817800	599491	243411	152252	3625950	3110181	31844	29627	619356	336140
	CrPV IRES		HCV IRES		P35 IRES		Readthrough		UAA		PRF
	CRISPR Ctrl	SNORA33 KO	CRISPR Ctrl	SNORA33 KO	CRISPR Ctrl	SNORA33 KO	CRISPR Ctrl	SNORA33 KO	CRISPR Ctrl	SNORA33 KO	CRISPR Ctrl	SNORA33 KO
Rluc	19703358	11448880	25280224	11138684	24136908	9778261	4562074	3971520	12590053	6009595	17548996	9278134
	19288070	12281071	21761907	12907216	16288725	10913454	4951122	3739145	11781478	7543544	12542704	8155597
	18175359	13959330	19136914	13568353	19072551	15609160	4704427	4673825	12703749	8932506	11962052	11412358
	51380544	25086588	17132226	11752402	22371118	13135583	18306304	11072855	27821031	20262893	28104329	18834993
	40851896	31208986	13375772	12625198	19581694	17496858	14333606	10571424	26046801	17476910	25060198	19334785
	32320707	28241597	13781205	14556274	20414067	16513007	16320169	11953886	20531543	20493091	25673606	18042617
	21433955	11400755	20488109	16692321	16459202	16558791	9233590	7080052	20315316	13508722	28638188	14701772
	16367306	11948806	16775518	12836096	17334556	16369624	8013272	6546551	13343087	9706991	24373362	11235710
	14016914	9752724	14871378	9744003	22676998	12682130	8281628	6608597	15606242	14996885	24019543	11458845
